# Supplementary material for: Albumin levels predict mortality in sepsis patients with acute kidney injury undergoing continuous renal replacement therapy: a secondary analysis based on a retrospective cohort study
Source: BMC Nephrol. 2022 Feb 2;23:52. doi: 10.1186/s12882-021-02629-y (PMC8812024; doi:10.1186/s12882-021-02629-y)
Supplement: Supplementary file 1 — Additional file 1: Table S1. [file 12882_2021_2629_MOESM1_ESM.xlsx]

## Sheet: Table S1
Table S1. Results of univariate analysis
Variable	Statistics	Death at 28days HR(95%CI) P	Statistics2	Death at 90 days HR(95%CI) P
Age(years)	63.62 ± 14.11	1.00 (1.00, 1.01) 0.4735	63.62 ± 14.11	1.00 (1.00, 1.01) 0.3785
Sex
Male	492 (61.96%)	Ref	492 (61.96%)	Ref
Female	302 (38.04%)	1.00 (0.83, 1.19) 0.9714	302 (38.04%)	1.08 (0.92, 1.28) 0.3566
K(mmol/L)	4.71 ± 1.09	1.00 (0.92, 1.09) 0.9292	4.71 ± 1.09	1.03 (0.96, 1.12) 0.3988
HCO3(mmol/L)	16.97 ± 5.63	0.99 (0.97, 1.01) 0.1893	16.97 ± 5.63	0.99 (0.98, 1.01) 0.4024
P(mg/dl)	5.64 ± 2.30	1.08 (1.04, 1.12) <0.0001	5.64 ± 2.30	1.07 (1.04, 1.11) <0.0001
aCCI score	3.11 ± 2.27	1.07 (1.03, 1.11) 0.0002	3.11 ± 2.27	1.05 (1.02, 1.09) 0.0024
BMI(kg/m2)	23.57 ± 4.46	0.97 (0.95, 1.00) 0.0190	23.57 ± 4.46	0.97 (0.95, 0.99) 0.0018
SBP(mmHg)	111.54 ± 20.96	0.99 (0.98, 0.99) <0.0001	111.54 ± 20.96	0.99 (0.98, 0.99) <0.0001
DBP(mmHg)	60.75 ± 14.14	0.99 (0.98, 1.00) 0.0024	60.75 ± 14.14	0.99 (0.99, 1.00) 0.0134
MAP(mmHg)	77.47 ± 14.80	0.99 (0.98, 0.99) <0.0001	77.47 ± 14.80	0.99 (0.98, 0.99) <0.0001
MV
No	166 (20.93%)	Ref	166 (20.93%)	Ref
Yes	627 (79.07%)	1.66 (1.31, 2.12) <0.0001	627 (79.07%)	1.50 (1.21, 1.85) 0.0002
WBC(uL)	14077.05 ± 13612.55	1.00 (1.00, 1.00) 0.3942	14077.05 ± 13612.55	1.00 (1.00, 1.00) 0.2803
HGB(g/dl)	9.70 ± 2.17	0.96 (0.92, 1.00) 0.0330	9.70 ± 2.17	0.96 (0.92, 1.00) 0.0425
BUN(mg/dl)	56.84 ± 29.13	1.00 (1.00, 1.01) 0.1088	56.84 ± 29.13	1.00 (1.00, 1.00) 0.1115
Cr(mg/dl)	2.66 ± 1.46	0.92 (0.86, 0.98) 0.0074	2.66 ± 1.46	0.90 (0.84, 0.95) 0.0003
ALB(g/dl)	2.59 ± 0.58	0.71 (0.61, 0.82) <0.0001	2.59 ± 0.58	0.70 (0.61, 0.80) <0.0001
CRP(mg/L)	102.78 ± 104.68	1.00 (1.00, 1.00) 0.0528	102.78 ± 104.68	1.00 (1.00, 1.00) 0.1919
GFR(ml/min1.73m2)	31.80 ± 22.08	1.00 (1.00, 1.01) 0.3857	31.80 ± 22.08	1.00 (1.00, 1.01) 0.0279
UO(ml)	71.28 ± 101.26	1.00 (1.00, 1.00) <0.0001	71.28 ± 101.26	1.00 (1.00, 1.00) <0.0001
APACHE-II score	27.40 ± 7.97	1.03 (1.02, 1.04) <0.0001	27.40 ± 7.97	1.02 (1.01, 1.03) <0.0001
SOFA score	12.00 ± 3.54	1.16 (1.13, 1.19) <0.0001	12.00 ± 3.54	1.11 (1.08, 1.14) <0.0001
CRRT cause
Volume overload	102 (12.85%)	Ref	102 (12.85%)	Ref
metablic acidosis	183 (23.05%)	1.45 (1.06, 1.98) 0.0188	183 (23.05%)	1.40 (1.05, 1.87) 0.0214
hyperkalemia	39 (4.91%)	1.32 (0.82, 2.10) 0.2537	39 (4.91%)	1.25 (0.81, 1.92) 0.3078
uremia	81 (10.20%)	1.00 (0.68, 1.47) 0.9942	81 (10.20%)	1.16 (0.82, 1.65) 0.3920
oliguria	205 (25.82%)	1.06 (0.77, 1.46) 0.7157	205 (25.82%)	1.08 (0.81, 1.44) 0.6128
others	184 (23.17%)	1.41 (1.03, 1.93) 0.0340	184 (23.17%)	1.17 (0.88, 1.57) 0.2778
CRRT dose(ml/kg)	36.70 ± 4.73	1.01 (0.99, 1.03) 0.5783	36.70 ± 4.73	1.00 (0.98, 1.02) 0.9969
AKIN
stage Ⅱ	214 (26.95%)	Ref	214 (26.95%)	Ref
stage Ⅲ	580 (73.05%)	1.03 (0.85, 1.26) 0.7518	580 (73.05%)	1.02 (0.85, 1.23) 0.7946
